# Supplementary material for: Peripheral blood gene expression signatures of systemic immunity predict tumor microenvironment biology and therapeutic response in breast cancer
Source: Research Square preprint supplement (doi:10.21203/rs.3.rs-6926989/v1), 2025-07-07
Supplement: Supplementary file 1 [file 96c78caaa0da40998211ce90.xlsx]

## Sheet: Sheet1
RID	subtype	Response	treatment	Baseline T cell score	Baseline Chemotaxis score	EarlyTreatment T cell score	EarlyTreatment Chemotaxis score	Baseline clonality	ER	TNBC	Chemotaxis Delta
159284	TNBC	RD	Chemo	7.13824	-0.222935	5.82895	-0.328613	3.44909	0	1	-0.105678
153327	TNBC	pCR	Chemo+Pembro	5.05325	-0.0480748	5.09143	-0.0813497	3.3792	0	1	-0.033275
597873	TNBC	RD	Chemo+Pembro	-0.919584	-0.33208	-1.15836	0.0152736	2.94078	0	1	0.347353
574091	TNBC	pCR	Chemo+Pembro	-7.93913	-0.394678	8.05329	-0.0150581	4.61582	0	1	0.37962
581180	TNBC	RD	Chemo	-17.1117	0.0247447	2.71503	-0.0495525	2.24074	0	1	-0.0742972
494296	HR+ BC	RD	Chemo+Pembro	-2.72408	-0.328274	9.48983	-0.208284	4.97763	1	0	0.11999
425173	HR+ BC	pCR	Chemo+Pembro	-4.45274	-0.0338827	-0.041563	-0.235623	6.82739	1	0	-0.201741
847272	TNBC	RD	Chemo	5.52921	-0.230444	15.352	0.0802813	1.67644	0	1	0.310725
255577	TNBC	RD	Chemo	10.196	-0.389576	7.71819	-0.12287	4.99083	0	1	0.266706
326202	HR+ BC	RD	Chemo+Pembro	2.24332	-0.226273	-1.25027	-0.10904	3.97309	1	0	0.117233
456506	HR+ BC	RD	Chemo+Pembro	-4.57817	-0.133898	-4.34043	-0.381484	4.84598	1	0	-0.247586
922872	HR+ BC	RD	Chemo	-14.7353	-0.325849	-5.00659	-0.171808	3.64723	1	0	0.154041
172168	TNBC	RD	Chemo	-22.187	-0.170227	6.02078	-0.0204517	1.28389	0	1	0.149776
104384	HR+ BC	RD	Chemo+Pembro	-13.1703	-0.155235	-0.216479	-0.417719	1.29618	1	0	-0.262484
436371	HR+ BC	RD	Chemo	-10.5248	-0.0886487	-17.5465	-0.300812	2.62455	1	0	-0.212164
311455	HR+ BC	RD	Chemo	3.71935	-0.261721	-3.6946	-0.258459	5.6988	1	0	0.00326168
625854	TNBC	pCR	Chemo+Pembro	-0.208679	-0.250861	7.65967	-0.302284	3.9758	0	1	-0.0514226
735673	HR+ BC	RD	Chemo	0.308242	-0.321229	-0.0676583	-0.102551	5.08236	1	0	0.218678
414844	HR+ BC	RD	Chemo	-9.37579	-0.138818	-7.851	-0.325996	2.78721	1	0	-0.187178
767934	TNBC	pCR	Chemo	0.655928	-0.10806	0.318921	-0.110437	4.6169	0	1	-0.00237692
122579	HR+ BC	RD	Chemo	7.41281	-0.204337	-4.04872	0.0441804	4.28859	1	0	0.248518
431061	HR+ BC	RD	Chemo+Pembro	-1.65671	-0.485236	5.39902	-0.334792	3.93969	1	0	0.150443
168044	HR+ BC	RD	Chemo+Pembro	2.36233	-0.367708	-16.6566	-0.180415	3.97863	1	0	0.187293
724384	HR+ BC	RD	Chemo	1.5549	-0.489856	2.89312	-0.483395	4.85665	1	0	0.00646045
247641	TNBC	RD	Chemo	10.4291	-0.194283	-17.6559	-0.208909	4.29446	0	1	-0.0146259
683173	HR+ BC	pCR	Chemo+Pembro	9.45553	-0.012588	7.17589	-0.21862	5.7508	1	0	-0.206032
703401	HR+ BC	RD	Chemo	-8.42176	-0.241613	5.87403	-0.41901	3.89138	1	0	-0.177397
664658	HR+ BC	pCR	Chemo+Pembro	6.56834	-0.0915426	1.01032	-0.276592	2.62445	1	0	-0.18505
473365	HR+ BC	RD	Chemo+Pembro	0.822463	-0.0222703	-8.57228	-0.156669	2.27647	1	0	-0.134399
532183	TNBC	RD	Chemo	-8.50668	0.0405313	18.2639	-0.28286	1.08053	0	1	-0.323391
804233	TNBC	pCR	Chemo+Pembro	5.06545	-0.000292443	14.373	0.0667475	2.86894	0	1	0.06704
484894	HR+ BC	RD	Chemo	14.6066	-0.28008	16.5959	-0.327908	4.7524	1	0	-0.0478289
242370	HR+ BC	pCR	Chemo+Pembro	13.8988	-0.30111	2.74909	-0.320026	4.55404	1	0	-0.0189166
356399	HR+ BC	pCR	Chemo	-10.8173	0.048408	-1.14718	0.0556274	4.75487	1	0	0.00721938
371528	HR+ BC	RD	Chemo+Pembro	9.99054	-0.116971	-6.91197	-0.0621055	4.46281	1	0	0.0548651
913527	TNBC	RD	Chemo	5.67501	-0.366456	1.85048	-0.298718	4.37952	0	1	0.0677374
259899	TNBC	RD	Chemo	2.83337	-0.2708	-4.63586	-0.299957	3.36062	0	1	-0.0291572
622688	TNBC	pCR	Chemo+Pembro	-2.45238	-0.0136814	22.9694	-0.0383847	4.09091	0	1	-0.0247033
866660	HR+ BC	RD	Chemo	3.2324	-0.466218	-3.00271	-0.457416	5.26198	1	0	0.00880239
177795	TNBC	pCR	Chemo+Pembro	6.54358	-0.279581	3.92022	-0.0180759	6.03981	0	1	0.261505
741535	HR+ BC	RD	Chemo	19.5313	-0.487261	10.4632	-0.394416	4.36033	1	0	0.0928449
550157	TNBC	pCR	Chemo	-24.5042	-0.254426	-8.86195	0.0392441	4.20087	0	1	0.29367
658541	HR+ BC	RD	Chemo	9.43674	-0.123184	-5.46253	-0.152686	3.57007	1	0	-0.0295027
674897	TNBC	RD	Chemo	27.8355	-0.340765	8.42666	-0.320346	4.58662	0	1	0.0204187
748611	HR+ BC	pCR	Chemo	0.821826	-0.136977	-9.42697	-0.261565	4.6632	1	0	-0.124588
181442	TNBC	pCR	Chemo	-23.5905	-0.0118094	13.9272	-0.133493	1.35808	0	1	-0.121683
289107	TNBC	pCR	Chemo+Pembro	-3.11829	-0.250972	1.66853	-0.370811	3.63668	0	1	-0.119839
848371	TNBC	pCR	Chemo+Pembro	3.4376	-0.186915	14.4483	-0.214822	5.07565	0	1	-0.0279068
333145	HR+ BC	pCR	Chemo+Pembro	6.55825	0.00135972	6.90849	-0.0893889	5.63639	1	0	-0.0907486
418593	HR+ BC	RD	Chemo	0.30329	-0.301966	-6.02988	-0.301863	3.80618	1	0	0.000102968
879224	TNBC	RD	Chemo	-3.11516	-0.153375	1.70221	-0.427751	4.144	0	1	-0.274376
752469	TNBC	RD	Chemo	20.7148	-0.300788	-3.72791	-0.139945	4.2636	0	1	0.160843
116603	TNBC	RD	Chemo	-3.20618	-0.415853	-3.49182	-0.47486	4.87823	0	1	-0.0590078
701790	HR+ BC	RD	Chemo+Pembro	0.920878	-0.321207	7.50156	-0.0183388	4.34672	1	0	0.302868
899381	HR+ BC	pCR	Chemo	-5.05356	-0.343378	0.350969	-0.353349	5.69475	1	0	-0.00997104
219545	TNBC	RD	Chemo	-15.9289	-0.171235	-8.96218	-0.0927149	3.6939	0	1	0.0785204
653927	TNBC	pCR	Chemo	-8.62817	-0.0839847	-9.81691	0.00598237	4.09965	0	1	0.089967
423979	HR+ BC	RD	Chemo	14.2548	-0.285557	-6.69933	-0.297075	4.81832	1	0	-0.0115182
668752	TNBC	RD	Chemo+Pembro	-11.894	-0.289542	-12.8695	-0.358108	4.1306	0	1	-0.0685655
342996	HR+ BC	RD	Chemo	0.858184	-0.248323	-1.2674	-0.454043	4.20072	1	0	-0.205719
355942	HR+ BC	RD	Chemo	4.17125	-0.0305818	6.57881	-0.355108	3.38391	1	0	-0.324526
209397	HR+ BC	RD	Chemo+Pembro	-7.35711	-0.338219	8.46827	-0.330653	4.33141	1	0	0.00756536
934906	TNBC	RD	Chemo	-15.6979	-0.109297	5.24737	-0.34342	4.5067	0	1	-0.234123
455828	HR+ BC	pCR	Chemo	16.2738	-0.327994	-12.9984	-0.0784615	3.88491	1	0	0.249532
103693	HR+ BC	RD	Chemo+Pembro	1.81971	-0.0640205	2.48185	-0.22511	5.39318	1	0	-0.161089
987914	TNBC	RD	Chemo	-5.78394	-0.490083	-3.05099	-0.0069284	4.80715	0	1	0.483155
803514	HR+ BC	RD	Chemo	20.0212	-0.189372	21.1543	-0.380603	3.28603	1	0	-0.191231
114087	HR+ BC	RD	Chemo+Pembro	-13.6437	0.158019	-21.5308	0.0299494	2.04808	1	0	-0.12807
442981	HR+ BC	pCR	Chemo+Pembro	0.330271	-0.211943	-3.4233	-0.448115	4.55493	1	0	-0.236172
688955	HR+ BC	RD	Chemo	-6.01174	-0.26849	6.08061	-0.18191	3.77453	1	0	0.0865805
147139	TNBC	pCR	Chemo+Pembro	-17.0321	-0.103719	-17.4709	-0.291616	4.88665	0	1	-0.187897
328160	HR+ BC	RD	Chemo	-12.0854	-0.485985	-13.0281	-0.470609	5.43544	1	0	0.0153753
847753	HR+ BC	pCR	Chemo+Pembro	2.09591	-0.273909	-8.33981	-0.117371	3.86229	1	0	0.156538
553012	HR+ BC	RD	Chemo+Pembro	6.2942	-0.346167	-5.79718	-0.155805	3.48	1	0	0.190362
142688	TNBC	RD	Chemo	8.61132	-0.157623	5.24993	-0.391992	5.58296	0	1	-0.23437
353318	TNBC	RD	Chemo	2.71459	-0.145761	-14.1146	-0.164287	4.92631	0	1	-0.0185258
963303	HR+ BC	RD	Chemo	-3.83626	-0.495164	-8.80009	-0.42376	5.05636	1	0	0.0714042
640043	HR+ BC	RD	Chemo+Pembro	-4.70869	-0.144046	-7.86901	-0.208646	2.35644	1	0	-0.0645994
111004	HR+ BC	RD	Chemo+Pembro	-13.5946	-0.204244	-0.517082	-0.00902419	4.47778	1	0	0.19522
363669	HR+ BC	RD	Chemo	16.4552	-0.429637	4.18913	-0.0824716	4.71761	1	0	0.347165
941926	HR+ BC	RD	Chemo	4.51146	-0.206697	-0.549354	-0.223638	3.77777	1	0	-0.0169413
500826	HR+ BC	RD	Chemo+Pembro	-39.8245	-0.128849	-7.26722	-0.176538	1.06018	1	0	-0.047689
194024	HR+ BC	pCR	Chemo+Pembro	21.4858	-0.180129	8.79399	-0.478318	5.75323	1	0	-0.298189
152197	TNBC	pCR	Chemo+Pembro	-12.4314	-0.0614095	-5.6205	-0.383067	4.30935	0	1	-0.321658
485637	TNBC	RD	Chemo+Pembro	-1.88271	0.00378402	-9.2357	0.0409896	2.92461	0	1	0.0372056
901705	HR+ BC	RD	Chemo	11.6972	-0.293565	9.36768	-0.103592	3.18003	1	0	0.189973
712785	TNBC	RD	Chemo	8.39459	-0.0463956	22.7423	-0.133849	5.75647	0	1	-0.0874536
489504	TNBC	pCR	Chemo	-24.0485	-0.226265	-19.3446	-0.115884	4.11968	0	1	0.110381
149654	HR+ BC	RD	Chemo+Pembro	0.930623	-0.439161	4.71419	-0.367928	4.7259	1	0	0.0712325
800710	TNBC	RD	Chemo	-15.4092	-0.366353	-13.1961	-0.351647	4.45344	0	1	0.0147057
698094	HR+ BC	RD	Chemo	0.4132	-0.255456	-2.40578	-0.452032	3.77108	1	0	-0.196576
734997	HR+ BC	RD	Chemo	0.131101	-0.199883	19.0766	-0.259743	4.27816	1	0	-0.0598595
421829	TNBC	RD	Chemo	8.25001	-0.138893	-5.05931	-0.0871826	5.38651	0	1	0.0517109
252748	TNBC	pCR	Chemo	21.6252	-0.207133	-4.54108	0.0346191	2.03139	0	1	0.241752
962664	TNBC	pCR	Chemo	1.48563	-0.0426171	10.3475	-0.23006	4.8108	0	1	-0.187443
655795	HR+ BC	pCR	Chemo	7.94385	-0.409029	2.20272	-0.390363	5.47718	1	0	0.0186655
950131	HR+ BC	pCR	Chemo	-2.09914	-0.231176	2.87235	-0.0195708	5.51509	1	0	0.211605
660534	TNBC	pCR	Chemo+Pembro	4.64535	-0.207314	12.6811	-0.250483	4.75573	0	1	-0.0431687
692885	TNBC	RD	Chemo+Pembro	2.65176	-0.399919	-11.0565	-0.0232448	4.29788	0	1	0.376675
834418	HR+ BC	RD	Chemo	2.48886	0.0213195	3.26166	0.0204374	5.96629	1	0	-0.000882149
233191	TNBC	RD	Chemo	-5.19841	-0.383831	-10.8428	-0.381852	4.68986	0	1	0.00197907
492612	TNBC	RD	Chemo	-22.5961	-0.177135	-13.9546	-0.147378	1.28973	0	1	0.0297569
885871	TNBC	RD	Chemo	-18.6796	-0.0604577	-7.06409	-0.0614635	2.06884	0	1	-0.00100579
775346	HR+ BC	RD	Chemo	2.63286	-0.45182	1.53364	-0.445502	5.71869	1	0	0.00631802
515565	TNBC	RD	Chemo	11.7649	-0.278865	23.8099	-0.148356	3.93035	0	1	0.130509
408692	TNBC	pCR	Chemo	4.88377	-0.151395	11.2645	0.0648222	3.78431	0	1	0.216217
497010	TNBC	pCR	Chemo+Pembro	1.06031	-0.018752	7.22046	0.000524447	3.26179	0	1	0.0192764
238790	TNBC	RD	Chemo	15.2576	-0.105525	16.3538	-0.214779	2.70271	0	1	-0.109254
792412	TNBC	RD	Chemo+Pembro	3.1499	-0.11467	-20.614	-0.0514814	3.64672	0	1	0.0631886
517870	TNBC	RD	Chemo	5.47367	-0.0758558	24.3109	-0.083077	3.15938	0	1	-0.0072212
752372	HR+ BC	RD	Chemo	-5.53444	-0.0455576	-13.733	-0.0493171	3.24814	1	0	-0.00375943
549172	TNBC	RD	Chemo	2.24305	0.104651	-4.97699	0.0184456	0.834659	0	1	-0.0862059
808714	TNBC	RD	Chemo	15.9534	0.0503171	4.25903	-0.123975	3.09963	0	1	-0.174293
128675	HR+ BC	pCR	Chemo	4.50934	-0.157163	23.7369	-0.385522	2.70775	1	0	-0.228359
421917	TNBC	RD	Chemo	-5.92232	-0.143673	3.13517	-0.101835	3.51284	0	1	0.041838
478655	TNBC	pCR	Chemo+Pembro	7.30466	-0.181286	17.5225	-0.133651	5.93809	0	1	0.0476354
586091	HR+ BC	pCR	Chemo+Pembro	4.77353	-0.35492	6.03337	-0.379652	4.55743	1	0	-0.0247315
970839	HR+ BC	RD	Chemo	6.18376	-0.319366	5.6604	-0.328601	5.44423	1	0	-0.00923498
796558	TNBC	RD	Chemo	2.23559	-0.0247127	-2.26884	-0.296547	5.14908	0	1	-0.271834
559263	TNBC	RD	Chemo	0.67202	-0.196894	10.7598	-0.166378	4.18663	0	1	0.0305167
231633	TNBC	pCR	Chemo+Pembro	-1.08132	-0.0956929	11.7514	-0.177496	2.62115	0	1	-0.0818026
