# Supplementary material for: Peripheral blood gene expression signatures of systemic immunity predict tumor microenvironment biology and therapeutic response in breast cancer
Source: Research Square preprint supplement (doi:10.21203/rs.3.rs-6926989/v1), 2025-07-07
Supplement: Supplementary file 2 [file bf7d53ee3c128b1774416176.xlsx]

## Sheet: Sheet1
RID	Subtype	Time	Treatment	Response	PICS7
425173	HR+ BC	Baseline	Chemo+Pembro	pCR	Total enrich
425173	HR+ BC	EarlyTreatment	Chemo+Pembro	pCR	Myeloid-NK-T cell
456506	HR+ BC	Baseline	Chemo+Pembro	RD	Myeloid-NK
456506	HR+ BC	EarlyTreatment	Chemo+Pembro	RD	T cell
735673	HR+ BC	Baseline	Chemo	RD	Myeloid-NK-T cell
735673	HR+ BC	EarlyTreatment	Chemo	RD	Myeloid-B cell
168044	HR+ BC	Baseline	Chemo+Pembro	RD	Myeloid-NK
168044	HR+ BC	EarlyTreatment	Chemo+Pembro	RD	Myeloid-NK
724384	HR+ BC	Baseline	Chemo	RD	T cell
724384	HR+ BC	EarlyTreatment	Chemo	RD	T cell
866660	HR+ BC	Baseline	Chemo	RD	T cell
866660	HR+ BC	EarlyTreatment	Chemo	RD	T cell
741535	HR+ BC	Baseline	Chemo	RD	NK-T cell
741535	HR+ BC	EarlyTreatment	Chemo	RD	NK-T-B cell
701790	HR+ BC	Baseline	Chemo+Pembro	RD	Myeloid-B cell
701790	HR+ BC	EarlyTreatment	Chemo+Pembro	RD	Myeloid-NK-T cell
423979	HR+ BC	Baseline	Chemo	RD	NK-T cell
423979	HR+ BC	EarlyTreatment	Chemo	RD	NK-T-B cell
294739	HR+ BC	Baseline	Chemo	RD	Total enrich
342996	HR+ BC	Baseline	Chemo	RD	NK-T-B cell
342996	HR+ BC	EarlyTreatment	Chemo	RD	T cell
355942	HR+ BC	Baseline	Chemo	RD	Myeloid-NK-T cell
355942	HR+ BC	EarlyTreatment	Chemo	RD	Myeloid-NK
520258	HR+ BC	Baseline	Chemo	RD	Total enrich
209397	HR+ BC	Baseline	Chemo+Pembro	RD	Myeloid-B cell
209397	HR+ BC	EarlyTreatment	Chemo+Pembro	RD	NK-T cell
491526	HR+ BC	EarlyTreatment	Chemo	RD	NK-T cell
103693	HR+ BC	Baseline	Chemo+Pembro	RD	Total enrich
103693	HR+ BC	EarlyTreatment	Chemo+Pembro	RD	Total enrich
442981	HR+ BC	Baseline	Chemo+Pembro	pCR	Myeloid-NK
442981	HR+ BC	EarlyTreatment	Chemo+Pembro	pCR	T cell
328160	HR+ BC	Baseline	Chemo	RD	T cell
328160	HR+ BC	EarlyTreatment	Chemo	RD	T cell
300724	HR+ BC	EarlyTreatment	Chemo	RD	NK-T cell
896939	HR+ BC	EarlyTreatment	Chemo+Pembro	RD	NK-T-B cell
963303	HR+ BC	Baseline	Chemo	RD	T cell
963303	HR+ BC	EarlyTreatment	Chemo	RD	T cell
640043	HR+ BC	Baseline	Chemo+Pembro	RD	Total enrich
640043	HR+ BC	EarlyTreatment	Chemo+Pembro	RD	Myeloid-B cell
901705	HR+ BC	Baseline	Chemo	RD	Myeloid-B cell
901705	HR+ BC	EarlyTreatment	Chemo	RD	Myeloid-B cell
698094	HR+ BC	Baseline	Chemo	RD	NK-T-B cell
698094	HR+ BC	EarlyTreatment	Chemo	RD	NK-T-B cell
734997	HR+ BC	Baseline	Chemo	RD	Myeloid-NK-T cell
734997	HR+ BC	EarlyTreatment	Chemo	RD	NK-T cell
655795	HR+ BC	Baseline	Chemo	pCR	NK-T-B cell
655795	HR+ BC	EarlyTreatment	Chemo	pCR	Myeloid-B cell
950131	HR+ BC	Baseline	Chemo	pCR	NK-T-B cell
950131	HR+ BC	EarlyTreatment	Chemo	pCR	Total enrich
493519	HR+ BC	Baseline	Chemo	RD	NK-T-B cell
834418	HR+ BC	Baseline	Chemo	RD	Total enrich
834418	HR+ BC	EarlyTreatment	Chemo	RD	Total enrich
970839	HR+ BC	Baseline	Chemo	RD	T cell
970839	HR+ BC	EarlyTreatment	Chemo	RD	T cell
241998	HR+ BC	Baseline	Chemo	RD	NK-T-B cell
255577	TNBC	Baseline	Chemo	RD	Myeloid-B cell
255577	TNBC	EarlyTreatment	Chemo	RD	Myeloid-NK-T cell
172168	TNBC	Baseline	Chemo	RD	Myeloid-B cell
172168	TNBC	EarlyTreatment	Chemo	RD	Total enrich
843554	TNBC	EarlyTreatment	Chemo	RD	Myeloid-NK-T cell
913527	TNBC	Baseline	Chemo	RD	Myeloid-NK-T cell
913527	TNBC	EarlyTreatment	Chemo	RD	Myeloid-NK-T cell
622688	TNBC	Baseline	Chemo+Pembro	pCR	Myeloid-NK
622688	TNBC	EarlyTreatment	Chemo+Pembro	pCR	NK-T cell
674897	TNBC	Baseline	Chemo	RD	NK-T cell
674897	TNBC	EarlyTreatment	Chemo	RD	Myeloid-NK
587604	TNBC	Baseline	Chemo	RD	NK-T cell
935460	TNBC	Baseline	Chemo	RD	Myeloid-NK
116603	TNBC	Baseline	Chemo	RD	T cell
116603	TNBC	EarlyTreatment	Chemo	RD	T cell
353318	TNBC	Baseline	Chemo	RD	Total enrich
353318	TNBC	EarlyTreatment	Chemo	RD	Myeloid-B cell
152197	TNBC	Baseline	Chemo+Pembro	pCR	Myeloid-B cell
152197	TNBC	EarlyTreatment	Chemo+Pembro	pCR	Myeloid-NK-T cell
485637	TNBC	Baseline	Chemo+Pembro	RD	Myeloid-NK-T cell
485637	TNBC	EarlyTreatment	Chemo+Pembro	RD	Myeloid-B cell
712785	TNBC	Baseline	Chemo	RD	Total enrich
712785	TNBC	EarlyTreatment	Chemo	RD	NK-T cell
800710	TNBC	Baseline	Chemo	RD	T cell
800710	TNBC	EarlyTreatment	Chemo	RD	NK-T-B cell
421829	TNBC	Baseline	Chemo	RD	NK-T cell
421829	TNBC	EarlyTreatment	Chemo	RD	Myeloid-B cell
660534	TNBC	Baseline	Chemo+Pembro	pCR	Total enrich
660534	TNBC	EarlyTreatment	Chemo+Pembro	pCR	Total enrich
233191	TNBC	Baseline	Chemo	RD	T cell
233191	TNBC	EarlyTreatment	Chemo	RD	T cell
885871	TNBC	Baseline	Chemo	RD	Myeloid-NK
885871	TNBC	EarlyTreatment	Chemo	RD	Myeloid-NK
497010	TNBC	Baseline	Chemo+Pembro	pCR	Myeloid-NK-T cell
497010	TNBC	EarlyTreatment	Chemo+Pembro	pCR	Total enrich
238790	TNBC	Baseline	Chemo	RD	Myeloid-NK-T cell
238790	TNBC	EarlyTreatment	Chemo	RD	NK-T cell
792412	TNBC	Baseline	Chemo+Pembro	RD	Total enrich
792412	TNBC	EarlyTreatment	Chemo+Pembro	RD	Myeloid-B cell
517870	TNBC	Baseline	Chemo	RD	Myeloid-NK-T cell
517870	TNBC	EarlyTreatment	Chemo	RD	NK-T cell
549172	TNBC	Baseline	Chemo	RD	Total enrich
549172	TNBC	EarlyTreatment	Chemo	RD	Total enrich
808714	TNBC	Baseline	Chemo	RD	Myeloid-NK-T cell
808714	TNBC	EarlyTreatment	Chemo	RD	Myeloid-NK-T cell
478655	TNBC	Baseline	Chemo+Pembro	pCR	NK-T cell
478655	TNBC	EarlyTreatment	Chemo+Pembro	pCR	NK-T cell
796558	TNBC	Baseline	Chemo	RD	Total enrich
796558	TNBC	EarlyTreatment	Chemo	RD	NK-T-B cell
559263	TNBC	Baseline	Chemo	RD	Myeloid-B cell
559263	TNBC	EarlyTreatment	Chemo	RD	Total enrich
231633	TNBC	Baseline	Chemo+Pembro	pCR	Myeloid-NK-T cell
231633	TNBC	EarlyTreatment	Chemo+Pembro	pCR	NK-T cell
892390	TNBC	Baseline	Chemo+Pembro	pCR	Total enrich
159284	TNBC	Baseline	Chemo	RD	Myeloid-B cell
159284	TNBC	EarlyTreatment	Chemo	RD	Myeloid-B cell
597873	TNBC	Baseline	Chemo+Pembro	RD	Myeloid-NK-T cell
597873	TNBC	EarlyTreatment	Chemo+Pembro	RD	Total enrich
847272	TNBC	Baseline	Chemo	RD	Myeloid-NK-T cell
847272	TNBC	EarlyTreatment	Chemo	RD	Myeloid-NK-T cell
326202	HR+ BC	Baseline	Chemo+Pembro	RD	Total enrich
326202	HR+ BC	EarlyTreatment	Chemo+Pembro	RD	Myeloid-B cell
922872	HR+ BC	Baseline	Chemo	RD	NK-T-B cell
922872	HR+ BC	EarlyTreatment	Chemo	RD	NK-T-B cell
104384	HR+ BC	Baseline	Chemo+Pembro	RD	Myeloid-NK
104384	HR+ BC	EarlyTreatment	Chemo+Pembro	RD	NK-T-B cell
436371	HR+ BC	Baseline	Chemo	RD	Myeloid-NK-T cell
436371	HR+ BC	EarlyTreatment	Chemo	RD	T cell
625854	TNBC	Baseline	Chemo+Pembro	pCR	T cell
625854	TNBC	EarlyTreatment	Chemo+Pembro	pCR	T cell
414844	HR+ BC	Baseline	Chemo	RD	Myeloid-NK-T cell
414844	HR+ BC	EarlyTreatment	Chemo	RD	Myeloid-NK-T cell
767934	TNBC	Baseline	Chemo	pCR	Myeloid-NK-T cell
767934	TNBC	EarlyTreatment	Chemo	pCR	Total enrich
431061	HR+ BC	Baseline	Chemo+Pembro	RD	Myeloid-B cell
431061	HR+ BC	EarlyTreatment	Chemo+Pembro	RD	Myeloid-B cell
247641	TNBC	Baseline	Chemo	RD	NK-T cell
247641	TNBC	EarlyTreatment	Chemo	RD	T cell
703401	HR+ BC	Baseline	Chemo	RD	Myeloid-B cell
703401	HR+ BC	EarlyTreatment	Chemo	RD	T cell
473365	HR+ BC	Baseline	Chemo+Pembro	RD	T cell
473365	HR+ BC	EarlyTreatment	Chemo+Pembro	RD	T cell
532183	TNBC	Baseline	Chemo	RD	Total enrich
532183	TNBC	EarlyTreatment	Chemo	RD	Myeloid-B cell
804233	TNBC	Baseline	Chemo+Pembro	pCR	Total enrich
804233	TNBC	EarlyTreatment	Chemo+Pembro	pCR	NK-T cell
484894	HR+ BC	Baseline	Chemo	RD	NK-T-B cell
484894	HR+ BC	EarlyTreatment	Chemo	RD	NK-T cell
242370	HR+ BC	Baseline	Chemo+Pembro	pCR	NK-T-B cell
242370	HR+ BC	EarlyTreatment	Chemo+Pembro	pCR	NK-T-B cell
259899	TNBC	Baseline	Chemo	RD	NK-T-B cell
259899	TNBC	EarlyTreatment	Chemo	RD	T cell
177795	TNBC	Baseline	Chemo+Pembro	pCR	NK-T cell
177795	TNBC	EarlyTreatment	Chemo+Pembro	pCR	Total enrich
658541	HR+ BC	Baseline	Chemo	RD	Myeloid-NK-T cell
658541	HR+ BC	EarlyTreatment	Chemo	RD	Myeloid-B cell
489194	HR+ BC	Baseline	Chemo+Pembro	pCR	Myeloid-B cell
607843	HR+ BC	Baseline	Chemo	RD	Myeloid-B cell
181442	TNBC	Baseline	Chemo	pCR	Myeloid-NK
181442	TNBC	EarlyTreatment	Chemo	pCR	Myeloid-B cell
848371	TNBC	Baseline	Chemo+Pembro	pCR	Total enrich
848371	TNBC	EarlyTreatment	Chemo+Pembro	pCR	Total enrich
901807	TNBC	EarlyTreatment	Chemo	RD	Myeloid-NK-T cell
347516	TNBC	Baseline	Chemo+Pembro	RD	Myeloid-NK
347516	TNBC	EarlyTreatment	Chemo+Pembro	RD	Total enrich
418593	HR+ BC	Baseline	Chemo	RD	Myeloid-B cell
418593	HR+ BC	EarlyTreatment	Chemo	RD	Myeloid-B cell
219545	TNBC	Baseline	Chemo	RD	Myeloid-B cell
219545	TNBC	EarlyTreatment	Chemo	RD	Myeloid-B cell
987914	TNBC	Baseline	Chemo	RD	T cell
987914	TNBC	EarlyTreatment	Chemo	RD	Total enrich
803514	HR+ BC	Baseline	Chemo	RD	Myeloid-NK-T cell
803514	HR+ BC	EarlyTreatment	Chemo	RD	NK-T cell
688955	HR+ BC	Baseline	Chemo	RD	Myeloid-NK
688955	HR+ BC	EarlyTreatment	Chemo	RD	NK-T cell
462582	HR+ BC	Baseline	Chemo	RD	Myeloid-NK
847753	HR+ BC	Baseline	Chemo+Pembro	pCR	NK-T cell
847753	HR+ BC	EarlyTreatment	Chemo+Pembro	pCR	Myeloid-NK-T cell
553012	HR+ BC	Baseline	Chemo+Pembro	RD	T cell
553012	HR+ BC	EarlyTreatment	Chemo+Pembro	RD	Myeloid-NK-T cell
264678	HR+ BC	Baseline	Chemo	RD	Myeloid-NK
198891	HR+ BC	Baseline	Chemo	RD	NK-T-B cell
363669	HR+ BC	Baseline	Chemo	RD	NK-T cell
363669	HR+ BC	EarlyTreatment	Chemo	RD	NK-T cell
446263	HR+ BC	EarlyTreatment	Chemo+Pembro	pCR	Myeloid-B cell
500826	HR+ BC	Baseline	Chemo+Pembro	RD	Myeloid-NK
500826	HR+ BC	EarlyTreatment	Chemo+Pembro	RD	Total enrich
320538	TNBC	Baseline	Chemo	RD	Myeloid-NK
320538	TNBC	EarlyTreatment	Chemo	RD	Myeloid-NK-T cell
252748	TNBC	Baseline	Chemo	pCR	Myeloid-NK-T cell
252748	TNBC	EarlyTreatment	Chemo	pCR	Myeloid-NK
962664	TNBC	Baseline	Chemo	pCR	Total enrich
962664	TNBC	EarlyTreatment	Chemo	pCR	Myeloid-NK
602943	TNBC	Baseline	Chemo	pCR	NK-T cell
492612	TNBC	Baseline	Chemo	RD	Myeloid-NK
492612	TNBC	EarlyTreatment	Chemo	RD	Myeloid-NK
515565	TNBC	Baseline	Chemo	RD	NK-T cell
515565	TNBC	EarlyTreatment	Chemo	RD	Myeloid-NK-T cell
752372	HR+ BC	Baseline	Chemo	RD	Myeloid-NK
752372	HR+ BC	EarlyTreatment	Chemo	RD	Myeloid-NK-T cell
128675	HR+ BC	Baseline	Chemo	pCR	Myeloid-B cell
128675	HR+ BC	EarlyTreatment	Chemo	pCR	NK-T cell
421917	TNBC	Baseline	Chemo	RD	Myeloid-B cell
421917	TNBC	EarlyTreatment	Chemo	RD	Total enrich
586091	HR+ BC	Baseline	Chemo+Pembro	pCR	T cell
586091	HR+ BC	EarlyTreatment	Chemo+Pembro	pCR	NK-T cell
142688	TNBC	Baseline	Chemo	RD	NK-T cell
424541	HR+ BC	Baseline	Chemo	RD	Myeloid-NK
899381	HR+ BC	Baseline	Chemo	pCR	NK-T-B cell
879224	TNBC	Baseline	Chemo	RD	Total enrich
879224	TNBC	EarlyTreatment	Chemo	RD	NK-T-B cell
581180	TNBC	Baseline	Chemo	RD	Myeloid-NK
581180	TNBC	EarlyTreatment	Chemo	RD	Myeloid-NK
752469	TNBC	Baseline	Chemo	RD	NK-T cell
752469	TNBC	EarlyTreatment	Chemo	RD	T cell
550157	TNBC	Baseline	Chemo	pCR	Myeloid-B cell
550157	TNBC	EarlyTreatment	Chemo	pCR	Myeloid-B cell
408692	TNBC	Baseline	Chemo	pCR	NK-T cell
408692	TNBC	EarlyTreatment	Chemo	pCR	Myeloid-NK-T cell
489504	TNBC	Baseline	Chemo	pCR	T cell
489504	TNBC	EarlyTreatment	Chemo	pCR	Myeloid-NK
653927	TNBC	Baseline	Chemo	pCR	Myeloid-B cell
653927	TNBC	EarlyTreatment	Chemo	pCR	Total enrich
142688	TNBC	EarlyTreatment	Chemo	RD	T cell
934906	TNBC	Baseline	Chemo	RD	Myeloid-B cell
934906	TNBC	EarlyTreatment	Chemo	RD	NK-T-B cell
494946	TNBC	Baseline	Chemo+Pembro	pCR	Myeloid-B cell
692885	TNBC	Baseline	Chemo+Pembro	RD	Myeloid-B cell
692885	TNBC	EarlyTreatment	Chemo+Pembro	RD	Myeloid-B cell
147139	TNBC	Baseline	Chemo+Pembro	pCR	Myeloid-NK
147139	TNBC	EarlyTreatment	Chemo+Pembro	pCR	Myeloid-B cell
668752	TNBC	Baseline	Chemo+Pembro	RD	Myeloid-NK
668752	TNBC	EarlyTreatment	Chemo+Pembro	RD	T cell
289107	TNBC	Baseline	Chemo+Pembro	pCR	Myeloid-NK
289107	TNBC	EarlyTreatment	Chemo+Pembro	pCR	NK-T-B cell
391942	TNBC	Baseline	Chemo+Pembro	pCR	Myeloid-B cell
574091	TNBC	Baseline	Chemo+Pembro	pCR	T cell
574091	TNBC	EarlyTreatment	Chemo+Pembro	pCR	NK-T cell
153327	TNBC	Baseline	Chemo+Pembro	pCR	NK-T cell
153327	TNBC	EarlyTreatment	Chemo+Pembro	pCR	T cell
114087	HR+ BC	Baseline	Chemo+Pembro	RD	Myeloid-NK
114087	HR+ BC	EarlyTreatment	Chemo+Pembro	RD	Myeloid-NK
333145	HR+ BC	Baseline	Chemo+Pembro	pCR	Total enrich
333145	HR+ BC	EarlyTreatment	Chemo+Pembro	pCR	Total enrich
455828	HR+ BC	Baseline	Chemo	pCR	NK-T cell
455828	HR+ BC	EarlyTreatment	Chemo	pCR	Myeloid-NK
371528	HR+ BC	Baseline	Chemo+Pembro	RD	Total enrich
371528	HR+ BC	EarlyTreatment	Chemo+Pembro	RD	T cell
122579	HR+ BC	Baseline	Chemo	RD	Myeloid-B cell
122579	HR+ BC	EarlyTreatment	Chemo	RD	Myeloid-B cell
356399	HR+ BC	Baseline	Chemo	pCR	Myeloid-B cell
356399	HR+ BC	EarlyTreatment	Chemo	pCR	Myeloid-B cell
664658	HR+ BC	Baseline	Chemo+Pembro	pCR	Myeloid-B cell
664658	HR+ BC	EarlyTreatment	Chemo+Pembro	pCR	Myeloid-B cell
857165	HR+ BC	EarlyTreatment	Chemo+Pembro	RD	NK-T-B cell
311455	HR+ BC	Baseline	Chemo	RD	NK-T-B cell
311455	HR+ BC	EarlyTreatment	Chemo	RD	Myeloid-B cell
775346	HR+ BC	Baseline	Chemo	RD	T cell
775346	HR+ BC	EarlyTreatment	Chemo	RD	T cell
194024	HR+ BC	Baseline	Chemo+Pembro	pCR	NK-T cell
194024	HR+ BC	EarlyTreatment	Chemo+Pembro	pCR	T cell
899381	HR+ BC	EarlyTreatment	Chemo	pCR	NK-T-B cell
748611	HR+ BC	Baseline	Chemo	pCR	NK-T cell
748611	HR+ BC	EarlyTreatment	Chemo	pCR	T cell
111004	HR+ BC	Baseline	Chemo+Pembro	RD	NK-T-B cell
111004	HR+ BC	EarlyTreatment	Chemo+Pembro	RD	NK-T-B cell
683173	HR+ BC	Baseline	Chemo+Pembro	pCR	NK-T cell
683173	HR+ BC	EarlyTreatment	Chemo+Pembro	pCR	NK-T cell
494296	HR+ BC	Baseline	Chemo+Pembro	RD	T cell
494296	HR+ BC	EarlyTreatment	Chemo+Pembro	RD	T cell
149654	HR+ BC	Baseline	Chemo+Pembro	RD	NK-T-B cell
149654	HR+ BC	EarlyTreatment	Chemo+Pembro	RD	NK-T-B cell
941926	HR+ BC	Baseline	Chemo	RD	Total enrich
941926	HR+ BC	EarlyTreatment	Chemo	RD	NK-T-B cell
