# Supplementary material for: Peripheral blood gene expression signatures of systemic immunity predict tumor microenvironment biology and therapeutic response in breast cancer
Source: Research Square preprint supplement (doi:10.21203/rs.3.rs-6926989/v1), 2025-07-07
Supplement: Supplementary file 4 [file fdd7e8729d114cc5ed1e8950.xlsx]

## Sheet: Sheet1
RID	Arm	Grade	Histology	HR	HER2	RCB.Class	PCR
627981	Paclitaxel	III	Invasive_ductal_carcinoma_nos	Negative	Negative	0	1
159284	Paclitaxel	III	Invasive_papillary_carcinoma	Negative	Negative	RCB-III	0
153327	Paclitaxel + Pembrolizumab	III	Invasive_ductal_carcinoma_nos	Negative	Negative	0	1
597873	Paclitaxel + Pembrolizumab	III	Invasive_ductal_carcinoma_nos	Negative	Negative	RCB-II	0
574091	Paclitaxel + Pembrolizumab	III	Invasive_ductal_carcinoma_nos	Negative	Negative	0	1
581180	Paclitaxel	III	Invasive_ductal_carcinoma_nos	Negative	Negative	RCB-I	0
494296	Paclitaxel + Pembrolizumab	II	Invasive_ductal_carcinoma_nos	Positive	Negative	RCB-III	0
425173	Paclitaxel + Pembrolizumab	III	Invasive_ductal_carcinoma_nos	Positive	Negative	0	1
847272	Paclitaxel	Blank in source	Invasive_ductal_carcinoma_nos	Negative	Negative	RCB-II	0
255577	Paclitaxel	III	Invasive_ductal_carcinoma_nos	Negative	Negative	RCB-II	0
494946	Paclitaxel + Pembrolizumab	III	Invasive_ductal_carcinoma_nos	Negative	Negative	0	1
326202	Paclitaxel + Pembrolizumab	III	Invasive_ductal_carcinoma_nos	Positive	Negative	RCB-II	0
873686	Paclitaxel + Pembrolizumab	II	Invasive_lobular_carcinoma_classic_type	Positive	Negative	RCB-I	0
456506	Paclitaxel + Pembrolizumab	III	Invasive_ductal_carcinoma_nos	Positive	Negative	RCB-II	0
922872	Paclitaxel	II	Invasive_ductal_carcinoma_nos	Positive	Negative	RCB-II	0
522140	Paclitaxel	Blank in source	Invasive_carcinoma_mixed_ductal_and_lobular_type	Positive	Negative	RCB-II	0
172168	Paclitaxel	Blank in source	Invasive_ductal_carcinoma_nos	Negative	Negative	RCB-II	0
104384	Paclitaxel + Pembrolizumab	III	Invasive_ductal_carcinoma_nos	Positive	Negative	RCB-II	0
436371	Paclitaxel	III	Invasive_ductal_carcinoma_nos	Positive	Negative	RCB-III	0
311455	Paclitaxel	III	Invasive_ductal_carcinoma_nos	Positive	Negative	RCB-II	0
625854	Paclitaxel + Pembrolizumab	II	Invasive_ductal_carcinoma_nos	Negative	Negative	0	1
735673	Paclitaxel	III	Invasive_ductal_carcinoma_nos	Positive	Negative	RCB-III	0
414844	Paclitaxel	III	Invasive_ductal_carcinoma_nos	Positive	Negative	RCB-III	0
767934	Paclitaxel	Blank in source	Invasive_ductal_carcinoma_nos	Negative	Negative	0	1
543795	Paclitaxel + Pembrolizumab	II	Invasive_ductal_carcinoma_nos	Positive	Negative	RCB-II	0
122579	Paclitaxel	II	Invasive_ductal_carcinoma_nos	Positive	Negative	RCB-II	0
431061	Paclitaxel + Pembrolizumab	III	Invasive_ductal_carcinoma_nos	Positive	Negative	RCB-II	0
168044	Paclitaxel + Pembrolizumab	II	Pleomorphic_lobular_carcinoma	Positive	Negative	RCB-III	0
724384	Paclitaxel	III	Invasive_ductal_carcinoma_nos	Positive	Negative	RCB-I	0
247641	Paclitaxel	III	Invasive_ductal_carcinoma_nos	Negative	Negative	RCB-II	0
683173	Paclitaxel + Pembrolizumab	II	Invasive_carcinoma_mixed_ductal_and_lobular_type	Positive	Negative	0	1
703401	Paclitaxel	Blank in source	Invasive_lobular_carcinoma_classic_type	Positive	Negative	RCB-II	0
664658	Paclitaxel + Pembrolizumab	II	Invasive_ductal_carcinoma_nos,Invasive mamary carcinoma	Positive	Negative	0	1
473365	Paclitaxel + Pembrolizumab	Blank in source	Invasive_ductal_carcinoma_nos	Positive	Negative	RCB-I	0
843554	Paclitaxel	Blank in source	Invasive_ductal_carcinoma_nos	Negative	Negative	RCB-I	0
532183	Paclitaxel	Blank in source	Invasive Mammary Carcinoma	Negative	Negative	RCB-III	0
804233	Paclitaxel + Pembrolizumab	Blank in source	Invasive_ductal_carcinoma_nos	Negative	Negative	0	1
484894	Paclitaxel	Blank in source	Invasive_ductal_carcinoma_nos	Positive	Negative	RCB-II	0
242370	Paclitaxel + Pembrolizumab	I	Invasive_carcinoma_mixed_ductal_and_lobular_type	Positive	Negative	0	1
356399	Paclitaxel	III	Invasive_ductal_carcinoma_nos	Positive	Negative	0	0
371528	Paclitaxel + Pembrolizumab	III	Invasive_ductal_carcinoma_nos	Positive	Negative	RCB-III	0
913527	Paclitaxel	III	Invasive_ductal_carcinoma_nos	Negative	Negative	RCB-I	0
259899	Paclitaxel	III	Invasive_ductal_carcinoma_nos	Negative	Negative	Blank in source	0
622688	Paclitaxel + Pembrolizumab	III	Invasive_ductal_carcinoma_nos	Negative	Negative	0	1
866660	Paclitaxel	II	Invasive_ductal_carcinoma_nos	Positive	Negative	RCB-III	0
177795	Paclitaxel + Pembrolizumab	III	Invasive_ductal_carcinoma_nos	Negative	Negative	0	1
741535	Paclitaxel	III	Invasive_ductal_carcinoma_nos	Positive	Negative	RCB-II	0
550157	Paclitaxel	III	Invasive_ductal_carcinoma_nos	Negative	Negative	0	1
658541	Paclitaxel	III	Invasive_ductal_carcinoma_nos	Positive	Negative	RCB-III	0
391942	Paclitaxel + Pembrolizumab	III	Invasive_ductal_carcinoma_nos	Negative	Negative	0	1
489194	Paclitaxel + Pembrolizumab	Blank in source	Invasive_ductal_carcinoma_nos	Positive	Negative	0	1
300724	Paclitaxel	Blank in source	Pleomorphic_lobular_carcinoma	Positive	Negative	RCB-II	0
674897	Paclitaxel	III	Invasive_ductal_carcinoma_nos	Negative	Negative	RCB-I	0
748611	Paclitaxel	III	Invasive_ductal_carcinoma_nos	Positive	Negative	0	1
587604	Paclitaxel	III	Invasive_ductal_carcinoma_nos	Negative	Negative	Blank in source	0
607843	Paclitaxel	Blank in source	Invasive_ductal_carcinoma_nos	Positive	Negative	RCB-II	0
473505	Paclitaxel + Pembrolizumab	III	Invasive_ductal_carcinoma_nos	Positive	Negative	RCB-I	0
935460	Paclitaxel	III	Invasive_ductal_carcinoma_nos	Negative	Negative	RCB-II	0
181442	Paclitaxel	III	Invasive_ductal_carcinoma_nos	Negative	Negative	0	0
896939	Paclitaxel + Pembrolizumab	III	Invasive_ductal_carcinoma_nos	Positive	Negative	RCB-III	0
293142	Paclitaxel	Blank in source	Invasive_carcinoma_mixed_ductal_and_lobular_type	Positive	Negative	RCB-I	0
303685	Paclitaxel + Pembrolizumab	III	Invasive breast carcinoma	Positive	Negative	0	1
289107	Paclitaxel + Pembrolizumab	III	Invasive_ductal_carcinoma_nos	Negative	Negative	0	1
848371	Paclitaxel + Pembrolizumab	Blank in source	Invasive_ductal_carcinoma_nos	Negative	Negative	0	1
901807	Paclitaxel	Blank in source	Invasive_ductal_carcinoma_nos	Negative	Negative	RCB-II	0
333145	Paclitaxel + Pembrolizumab	III	Invasive_ductal_carcinoma_nos	Positive	Negative	0	1
478055	Paclitaxel	III	Invasive_ductal_carcinoma_nos	Positive	Negative	RCB-II	0
347516	Paclitaxel + Pembrolizumab	III	Invasive_ductal_carcinoma_nos	Negative	Negative	RCB-II	0
418593	Paclitaxel	I	Invasive_ductal_carcinoma_nos	Positive	Negative	RCB-II	0
879224	Paclitaxel	III	Invasive_ductal_carcinoma_nos	Negative	Negative	RCB-II	0
752469	Paclitaxel	III	Invasive_carcinoma_mixed_ductal_and_lobular_type	Negative	Negative	RCB-II	0
116603	Paclitaxel	III	Invasive_ductal_carcinoma_nos	Negative	Negative	Blank in source	0
701790	Paclitaxel + Pembrolizumab	II	Invasive_ductal_carcinoma_nos	Positive	Negative	RCB-II	0
899381	Paclitaxel	II	Invasive_ductal_carcinoma_nos	Positive	Negative	0	1
218249	Paclitaxel	III	Invasive_ductal_carcinoma_nos	Positive	Negative	RCB-II	0
219545	Paclitaxel	Blank in source	Invasive_ductal_carcinoma_nos	Negative	Negative	RCB-II	0
653927	Paclitaxel	III	Invasive_ductal_carcinoma_nos	Negative	Negative	0	1
423979	Paclitaxel	II	Invasive_lobular_carcinoma_classic_type	Positive	Negative	RCB-II	0
294739	Paclitaxel	Blank in source	Invasive_ductal_carcinoma_nos	Positive	Negative	RCB-I	0
668752	Paclitaxel + Pembrolizumab	III	Invasive_ductal_carcinoma_nos	Negative	Negative	RCB-II	0
342996	Paclitaxel	III	Invasive_ductal_carcinoma_nos	Positive	Negative	RCB-II	0
355942	Paclitaxel	II	Invasive_ductal_carcinoma_nos	Positive	Negative	RCB-II	0
520258	Paclitaxel	III	Invasive_ductal_carcinoma_nos	Positive	Negative	RCB-II	0
181819	Paclitaxel	III	Invasive_ductal_carcinoma_nos	Positive	Negative	0	1
209397	Paclitaxel + Pembrolizumab	II	invasive ductal carcinoma with predominant lobular features	Positive	Negative	RCB-III	0
934906	Paclitaxel	Blank in source	Invasive_ductal_carcinoma_nos	Negative	Negative	RCB-II	0
455828	Paclitaxel	III	Invasive_ductal_carcinoma_nos	Positive	Negative	0	1
491526	Paclitaxel	II	Blank in source	Positive	Negative	RCB-III	0
103693	Paclitaxel + Pembrolizumab	II	Invasive_ductal_carcinoma_nos	Positive	Negative	RCB-II	0
987914	Paclitaxel	III	Invasive_ductal_carcinoma_nos	Negative	Negative	RCB-I	0
803514	Paclitaxel	III	Invasive_ductal_carcinoma_nos	Positive	Negative	RCB-I	0
114087	Paclitaxel + Pembrolizumab	II	Invasive_carcinoma_mixed_ductal_and_lobular_type	Positive	Negative	RCB-II	0
240432	Paclitaxel	Blank in source	Invasive_carcinoma_mixed_ductal_and_lobular_type	Positive	Negative	RCB-III	0
301289	Paclitaxel + Pembrolizumab	II	Invasive_ductal_carcinoma_nos	Positive	Negative	RCB-II	0
442981	Paclitaxel + Pembrolizumab	II	Invasive_ductal_carcinoma_nos	Positive	Negative	0	1
688955	Paclitaxel	II	Invasive_ductal_carcinoma_nos	Positive	Negative	RCB-II	0
147139	Paclitaxel + Pembrolizumab	III	Invasive_ductal_carcinoma_nos	Negative	Negative	0	1
328160	Paclitaxel	II	Invasive_carcinoma_mixed_ductal_and_lobular_type	Positive	Negative	RCB-II	0
462582	Paclitaxel	Blank in source	Invasive_carcinoma_mixed_ductal_and_lobular_type	Positive	Negative	RCB-II	0
847753	Paclitaxel + Pembrolizumab	Blank in source	Pleomorphic_lobular_carcinoma	Positive	Negative	0	1
553012	Paclitaxel + Pembrolizumab	Blank in source	Invasive_carcinoma_mixed_ductal_and_lobular_type	Positive	Negative	RCB-I	0
142688	Paclitaxel	II	Invasive_ductal_carcinoma_nos	Negative	Negative	RCB-II	0
357017	Paclitaxel	Blank in source	Invasive_lobular_carcinoma_classic_type	Positive	Negative	RCB-III	0
353318	Paclitaxel	II	Invasive_carcinoma_mixed_ductal_and_lobular_type	Negative	Negative	RCB-II	0
963303	Paclitaxel	II	Invasive_ductal_carcinoma_nos	Positive	Negative	RCB-III	0
264678	Paclitaxel	Blank in source	Invasive_carcinoma_mixed_ductal_and_lobular_type	Positive	Negative	RCB-I	0
640043	Paclitaxel + Pembrolizumab	III	Invasive_ductal_carcinoma_nos	Positive	Negative	RCB-II	0
111004	Paclitaxel + Pembrolizumab	II	Invasive_ductal_carcinoma_nos	Positive	Negative	RCB-II	0
198891	Paclitaxel	Blank in source	Invasive_ductal_carcinoma_nos	Positive	Negative	RCB-I	0
363669	Paclitaxel	Blank in source	Invasive_ductal_carcinoma_nos	Positive	Negative	RCB-II	0
941926	Paclitaxel	Blank in source	Invasive_ductal_carcinoma_nos	Positive	Negative	RCB-II	0
446263	Paclitaxel + Pembrolizumab	Blank in source	Invasive_ductal_carcinoma_nos	Positive	Negative	0	1
500826	Paclitaxel + Pembrolizumab	Blank in source	Invasive_ductal_carcinoma_nos	Positive	Negative	RCB-II	0
194024	Paclitaxel + Pembrolizumab	III	Invasive_ductal_carcinoma_nos	Positive	Negative	0	1
320538	Paclitaxel	Blank in source	Invasive_ductal_carcinoma_nos	Negative	Negative	RCB-I	0
152197	Paclitaxel + Pembrolizumab	III	Invasive_carcinoma_mixed_ductal_and_lobular_type	Negative	Negative	0	1
832056	Paclitaxel + Pembrolizumab	III	Invasive_ductal_carcinoma_nos	Negative	Negative	RCB-I	0
485637	Paclitaxel + Pembrolizumab	III	Invasive_ductal_carcinoma_nos	Negative	Negative	RCB-I	0
901705	Paclitaxel	III	Invasive_ductal_carcinoma_nos	Positive	Negative	RCB-III	0
712785	Paclitaxel	III	Invasive_ductal_carcinoma_nos	Negative	Negative	RCB-II	0
489504	Paclitaxel	III	Invasive_ductal_carcinoma_nos	Negative	Negative	0	1
149654	Paclitaxel + Pembrolizumab	Blank in source	invasive lobular carcinoma	Positive	Negative	RCB-I	0
857165	Paclitaxel + Pembrolizumab	Blank in source	Invasive_ductal_carcinoma_nos	Positive	Negative	RCB-III	0
800710	Paclitaxel	Blank in source	Invasive_ductal_carcinoma_nos	Negative	Negative	RCB-I	0
698094	Paclitaxel	II	Invasive_lobular_carcinoma_classic_type	Positive	Negative	RCB-III	0
734997	Paclitaxel	III	Invasive_ductal_carcinoma_nos	Positive	Negative	RCB-II	0
421829	Paclitaxel	III	Invasive_ductal_carcinoma_nos	Negative	Negative	RCB-II	0
252748	Paclitaxel	III	Invasive_ductal_carcinoma_nos	Negative	Negative	0	1
962664	Paclitaxel	Blank in source	Invasive_ductal_carcinoma_nos	Negative	Negative	0	1
655795	Paclitaxel	III	Invasive_ductal_carcinoma_nos	Positive	Negative	0	1
950131	Paclitaxel	II	Invasive_ductal_carcinoma_nos	Positive	Negative	0	1
493519	Paclitaxel	II	Invasive_ductal_carcinoma_nos	Positive	Negative	RCB-II	0
660534	Paclitaxel + Pembrolizumab	II	Invasive_ductal_carcinoma_nos	Negative	Negative	0	1
692885	Paclitaxel + Pembrolizumab	II	Invasive_ductal_carcinoma_nos	Negative	Negative	RCB-II	0
834418	Paclitaxel	II	Invasive_ductal_carcinoma_nos	Positive	Negative	RCB-III	0
602943	Paclitaxel	III	Invasive_ductal_carcinoma_nos	Negative	Negative	0	1
233191	Paclitaxel	III	Invasive_ductal_carcinoma_nos	Negative	Negative	RCB-III	0
424541	Paclitaxel	III	Invasive_ductal_carcinoma_nos	Positive	Negative	RCB-II	0
492612	Paclitaxel	III	Invasive ductal carcinoma with prominent lymphoplasmacytic infiltrate	Negative	Negative	RCB-I	0
885871	Paclitaxel	III	Invasive_ductal_carcinoma_nos	Negative	Negative	RCB-II	0
775346	Paclitaxel	III	Invasive_ductal_carcinoma_nos	Positive	Negative	RCB-II	0
515565	Paclitaxel	III	Invasive_ductal_carcinoma_nos	Negative	Negative	RCB-III	0
408692	Paclitaxel	III	Invasive_ductal_carcinoma_nos	Negative	Negative	0	1
497010	Paclitaxel + Pembrolizumab	III	Invasive_ductal_carcinoma_nos	Negative	Negative	0	1
238790	Paclitaxel	Blank in source	Invasive_ductal_carcinoma_nos	Negative	Negative	RCB-II	0
792412	Paclitaxel + Pembrolizumab	II	Invasive_ductal_carcinoma_nos	Negative	Negative	RCB-II	0
517870	Paclitaxel	III	Invasive_ductal_carcinoma_nos	Negative	Negative	RCB-II	0
752372	Paclitaxel	II	Invasive_ductal_carcinoma_nos	Positive	Negative	RCB-III	0
549172	Paclitaxel	II	Invasive_ductal_carcinoma_nos	Negative	Negative	RCB-I	0
808714	Paclitaxel	II	Pleomorphic_lobular_carcinoma,Invasive_carcinoma_mixed_ductal_and_lobular_type	Negative	Negative	RCB-II	0
128675	Paclitaxel	Blank in source	Invasive_ductal_carcinoma_nos	Positive	Negative	0	1
421917	Paclitaxel	Blank in source	Invasive_ductal_carcinoma_nos	Negative	Negative	RCB-II	0
478655	Paclitaxel + Pembrolizumab	III	Invasive_ductal_carcinoma_nos	Negative	Negative	0	1
586091	Paclitaxel + Pembrolizumab	III	Invasive_ductal_carcinoma_nos	Positive	Negative	0	1
970839	Paclitaxel	III	Invasive_ductal_carcinoma_nos	Positive	Negative	RCB-II	0
796558	Paclitaxel	III	Invasive_ductal_carcinoma_nos	Negative	Negative	RCB-II	0
559263	Paclitaxel	III	Invasive_ductal_carcinoma_nos	Negative	Negative	RCB-III	0
231633	Paclitaxel + Pembrolizumab	II	Invasive_ductal_carcinoma_nos	Negative	Negative	0	1
892390	Paclitaxel + Pembrolizumab	III	Invasive_ductal_carcinoma_nos	Negative	Negative	0	1
241998	Paclitaxel	I	Invasive_lobular_carcinoma_classic_type	Positive	Negative	RCB-II	0
